# Supplementary material
Source: PubMed Central journal article supplement (PMC4489980)
Supplement: NIHMS700658-supplement-Supp_Materials.pdf [file NIHMS700658-supplement-Supp_Materials.pdf]

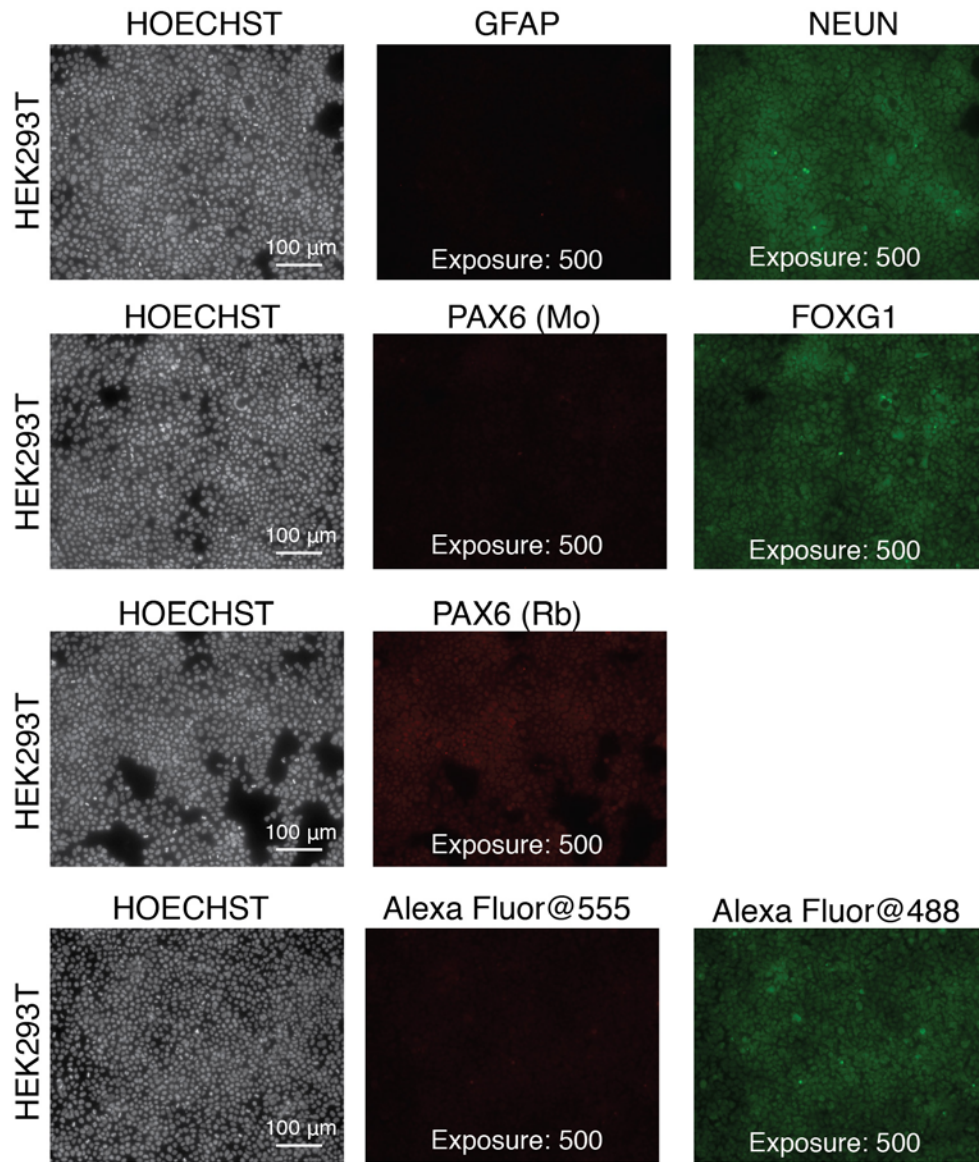

### Supplementary Figure 1

Antibody specificity.

Panel showing the specificity of the antibodies against NEUN, GFAP, FOXG1, PAX6 (Rb), PAX6 (Mo) in negative cells (HEK293T). The last row shows background immunostaining for secondary-only conditions. All images were collected at a 500 ms exposure.

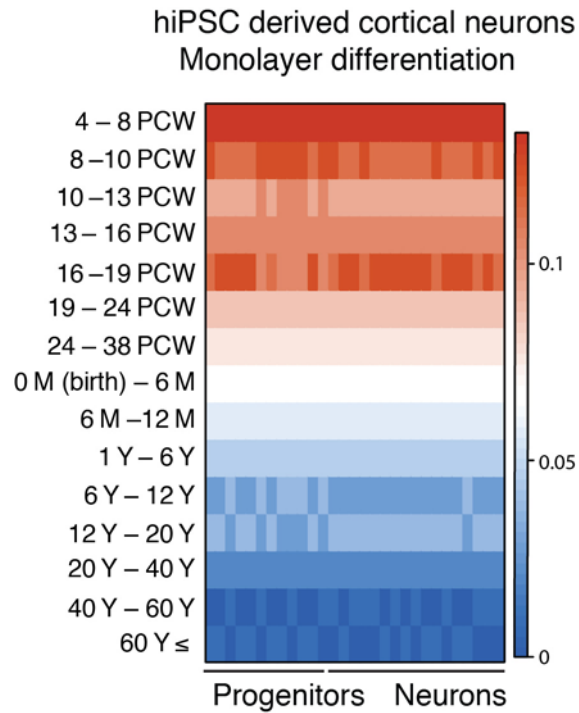

### Supplementary Figure 2

Transcriptional analyses and mapping of neuronal cultures derived from hiPSCs using a monolayer approach.

The machine learning algorithm CoNTEXT, which matches transcriptomes to human brain development, was used to predict the *in vivo* temporal identity of neural progenitors and neurons differentiated from hiPSC using a monolayer approach (adapted from Fig. 7 in Stein et. al., 2014). In contrast to the hCSs in **Fig. 1e** that reach up to fetal stage 6, these cultures map to earlier stages of brain development.

Stein, J.L., Torre-Ubieta, L., Tian, Y., Parikshak, N.P., Hernandez, I.A., Marchetto, M.C., Baker, D.K., Lu, D., Hinman, C.R., Lowe, J.K., Wexler, E.M., Muotri, A.R., Gage, F.H., Kosik, K.S., and Geschwind, D.H. A Quantitative Framework to Evaluate Modeling of Cortical Development by Neural Stem Cells *Neuron* **83**, 69-86 (2014).

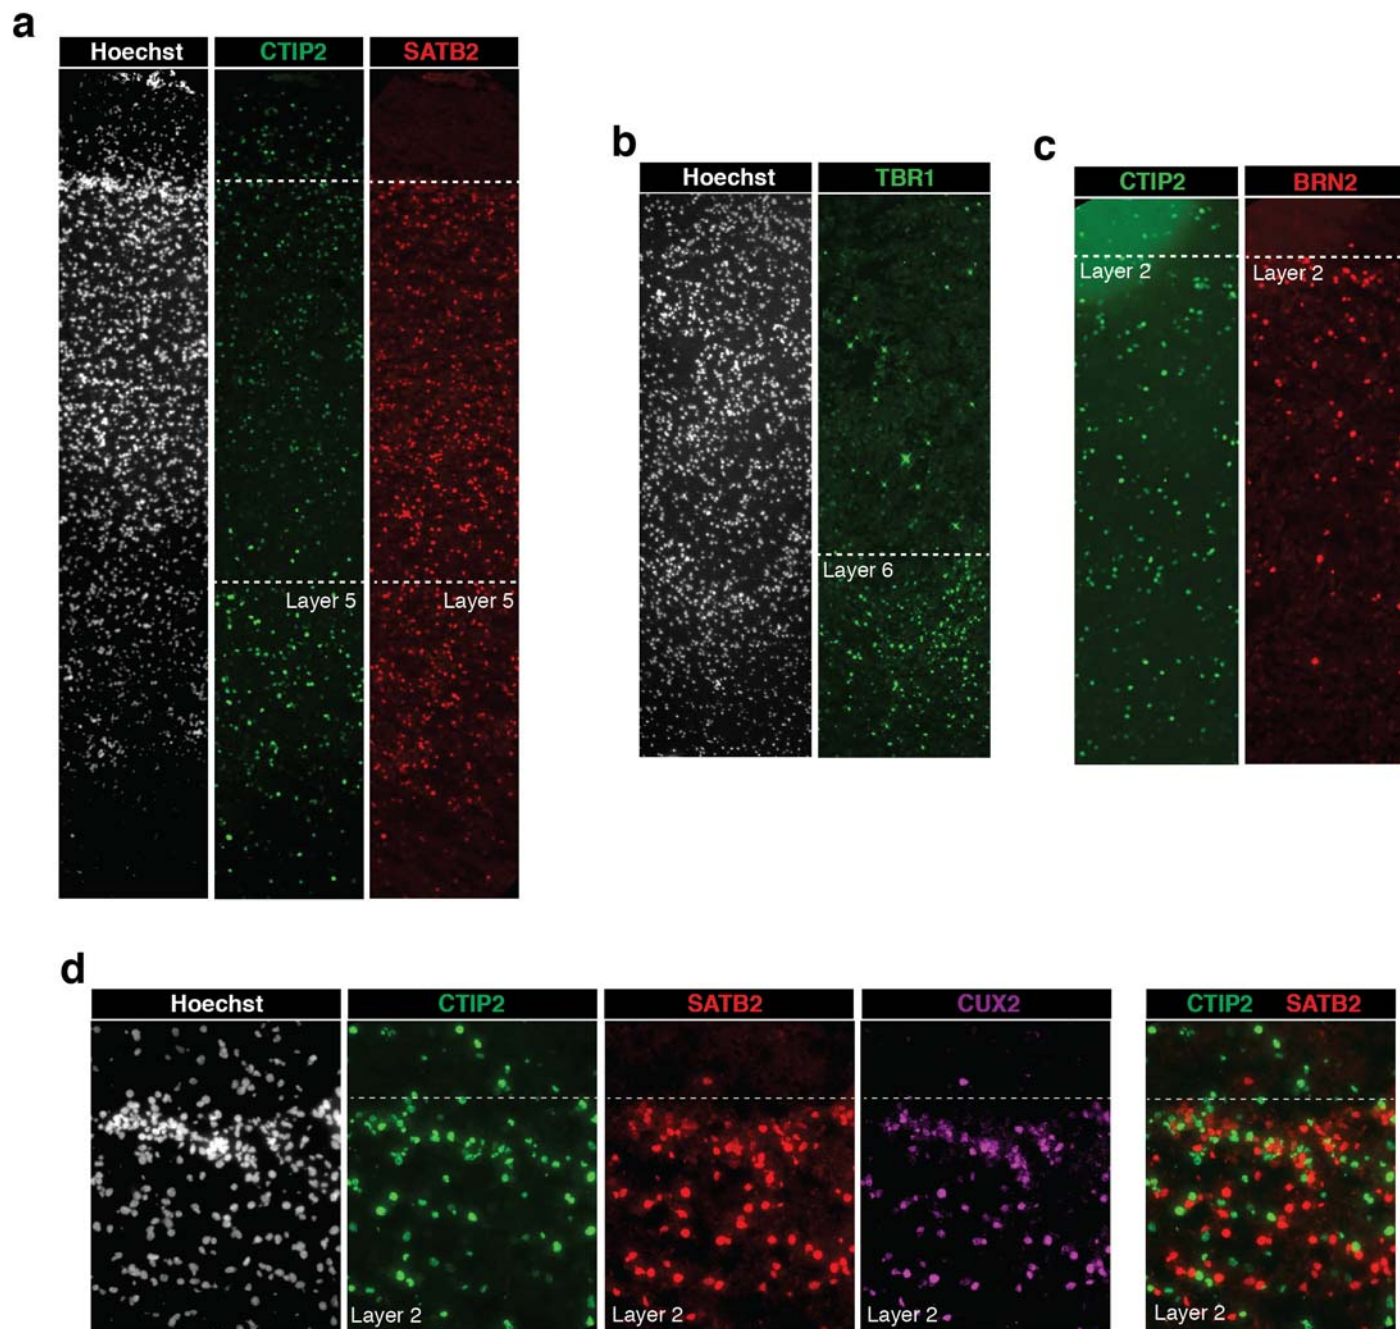

### Supplementary Figure 3

Validation of layer specific antibodies in the human fetal cortex at PCW36.

(a) CTIP2 and SATB2. (b) TBR1. (c) CTIP2 and BRN2. (d) CTIP2, SATB2 and CUX2.

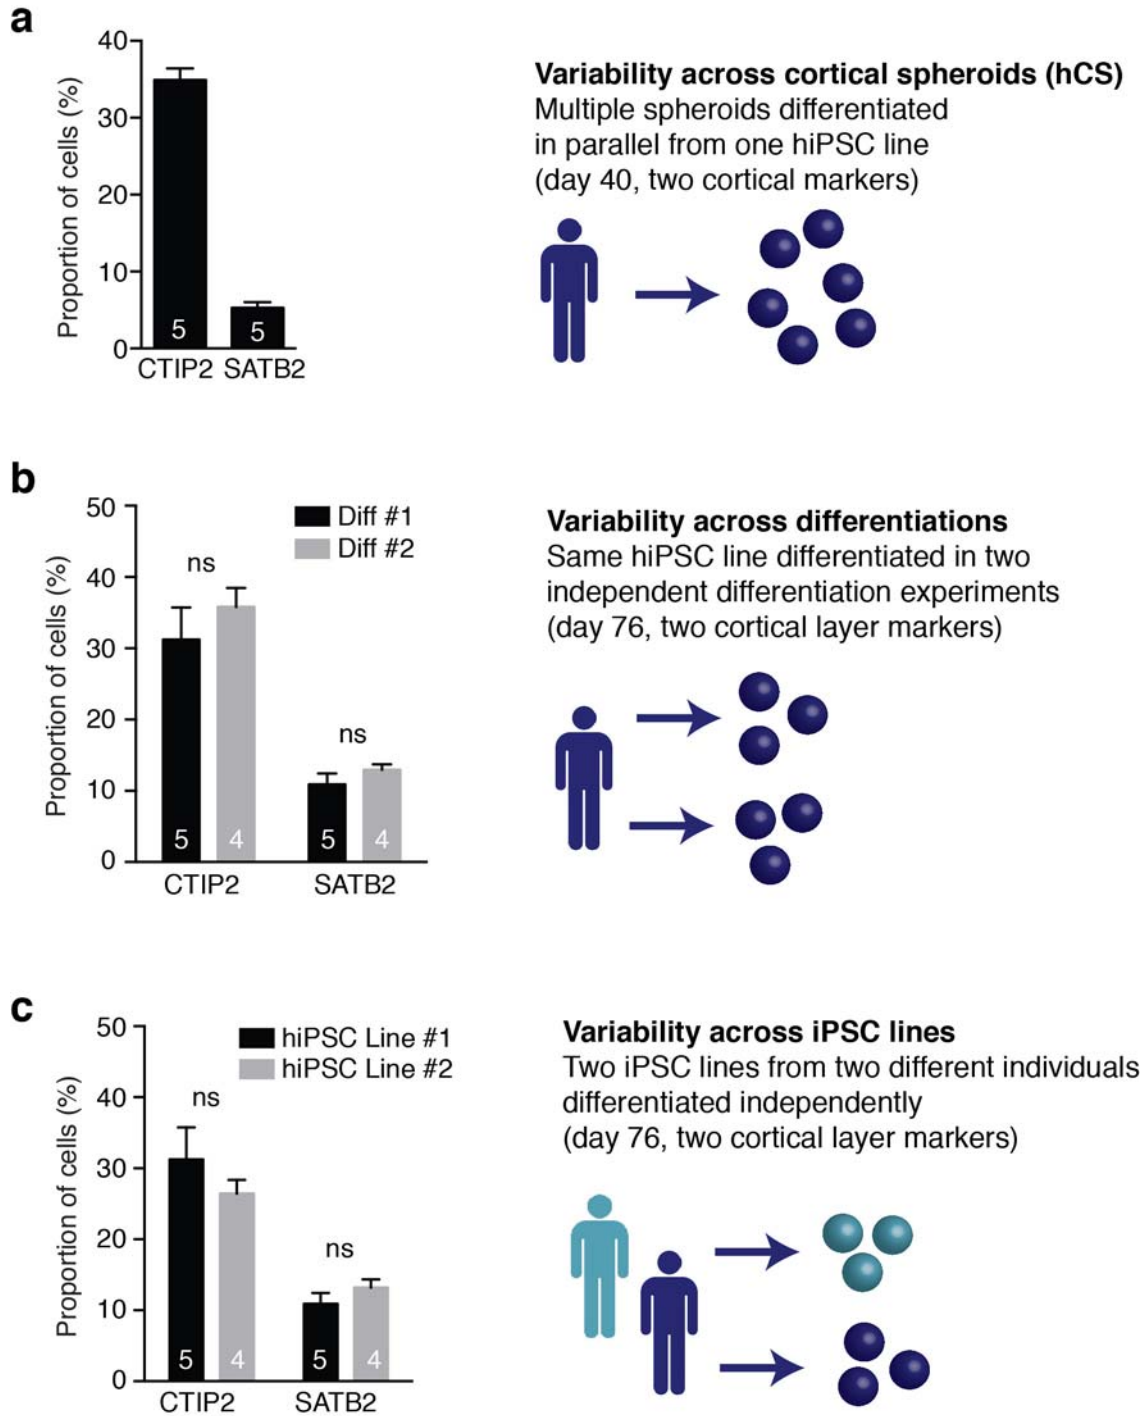

**Supplementary Figure 4**

Variability in the generation of hCSs.

(a) Proportion of neurons (mean  $\pm$  s.e.m.) expressing CTIP2 and SATB2 at day 40 of differentiation. Multiple spheroids differentiated at the same time from one hiPSC line. Standard deviation is 2.9% for CTIP2 and 1.5% for SATB2. (b) Proportion of neurons (mean  $\pm$  s.e.m.) expressing CTIP2 and SATB2 at day 76 of differentiation. The same hiPSC line was differentiated in two different experiments at two different times (multiple hCS per differentiation). Two-way ANOVA,  $F_{1,14} = 0.1940$ ,  $P = 0.66$  for hiPSC lines; multiple comparison test  $P > 0.05$ . (c) Proportion of neurons (mean  $\pm$  s.e.m.) expressing CTIP2 and SATB2 at day 76 of differentiation. Two hiPSC lines derived from two individuals were differentiated at two different times (multiple hCS per differentiation). Two-way ANOVA,  $F_{1,14} = 1.257$ ,

$P = 0.28$ ; multiple comparison test  $P > 0.05$ .



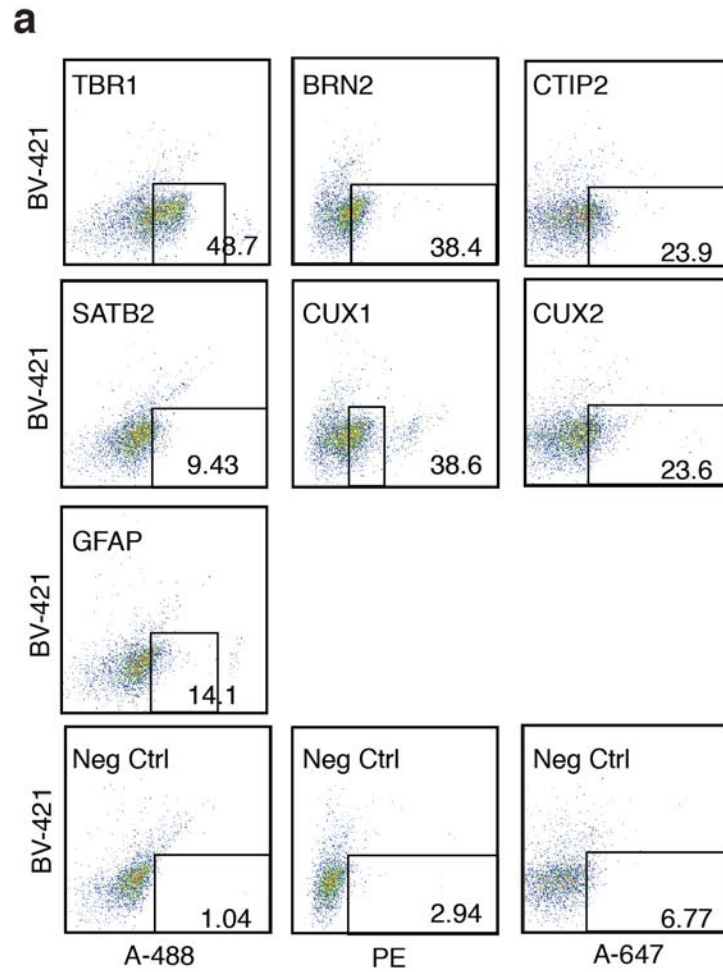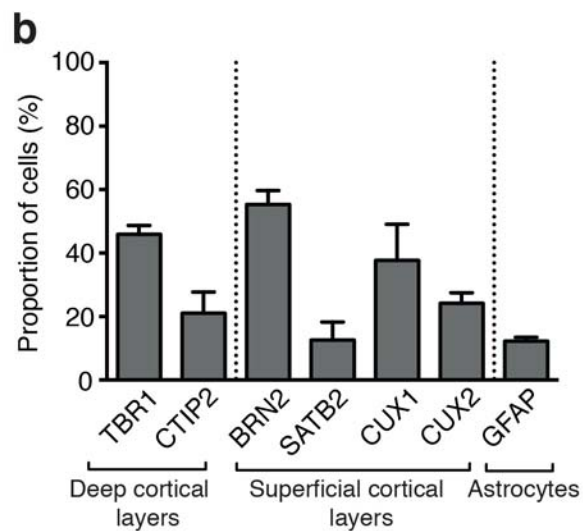

**Supplementary Figure 5**

Flow cytometry analysis of hCSs.

(a) Example of scatter plots for each of the antibodies used (first three rows) and the secondary only control conditions (fourth row). The

marker of interest is presented on the x-axis and the threshold gate is based on the negative control samples (cells stained with secondary antibodies alone). The y-axis represents a "dump channel", a BV-421 fluorescent channel in which the cells were not stained with any fluorophores. Any positive signals on this BV-421 channel represent highly auto-flourescent cells or false positives and were excluded from the actual positive gates. **(b)** Quantification of the proportion of cells expressing various markers at day 76 of *in vitro* differentiation as assessed by flow cytometry.

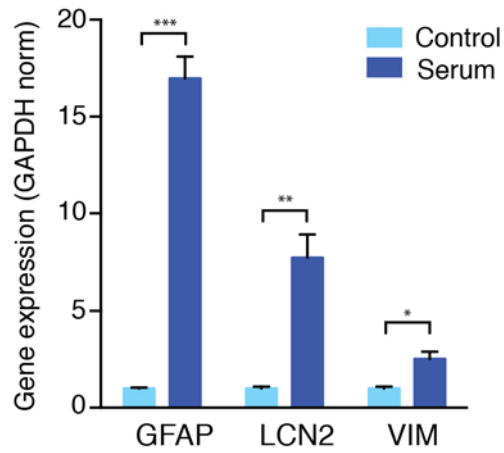

### Supplementary Figure 6

Expression of activation markers in hCSs before and after exposure to serum.

hCSs plated in monolayer were cultured in Neurobasal–B27 media with or without 20% serum (FBS). After 5 days, cells were harvested and the expression of genes associated with astrocyte activation (*GFAP*, *VIM*, *LCN2*) was measured by qPCR (t-tests with multiple comparison corrections using the Holm-Sidak method;  $n = 3$  for each gene, \*,  $P < 0.05$ ; \*\*,  $P < 0.01$ ; \*\*\*,  $P < 0.001$ ).



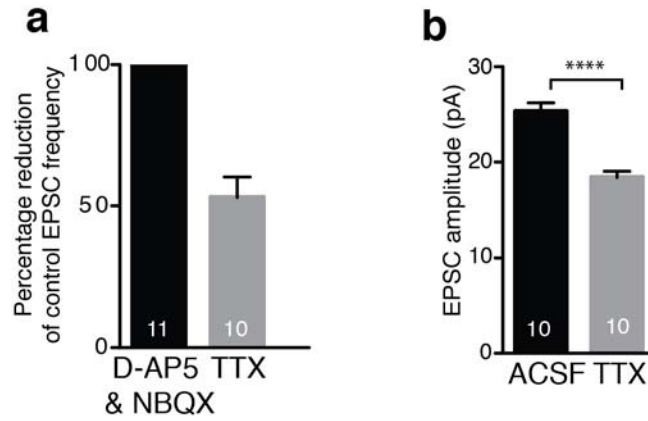

### Supplementary Figure 7

Electrophysiology (hCSs plated in monolayer).

(a) Pharmacology of synaptic currents in neurons derived in hCS and plated in monolayer (at  $-70$  mV). The frequency of EPSCs was abolished by NBQX ( $25 \mu\text{M}$ ) and D-AP5 ( $50 \mu\text{M}$ ) (paired t-test,  $n = 11$  cells,  $P = 0.001$ ), and was significantly reduced by  $1 \mu\text{M}$  TTX (Wilcoxon signed-rank test,  $n = 10$ ,  $P = 0.002$ ). (b) TTX significantly reduced the amplitude of the EPSCs ( $P < 0.0001$ , paired t-test, versus ACSF,  $n = 10$  cells).

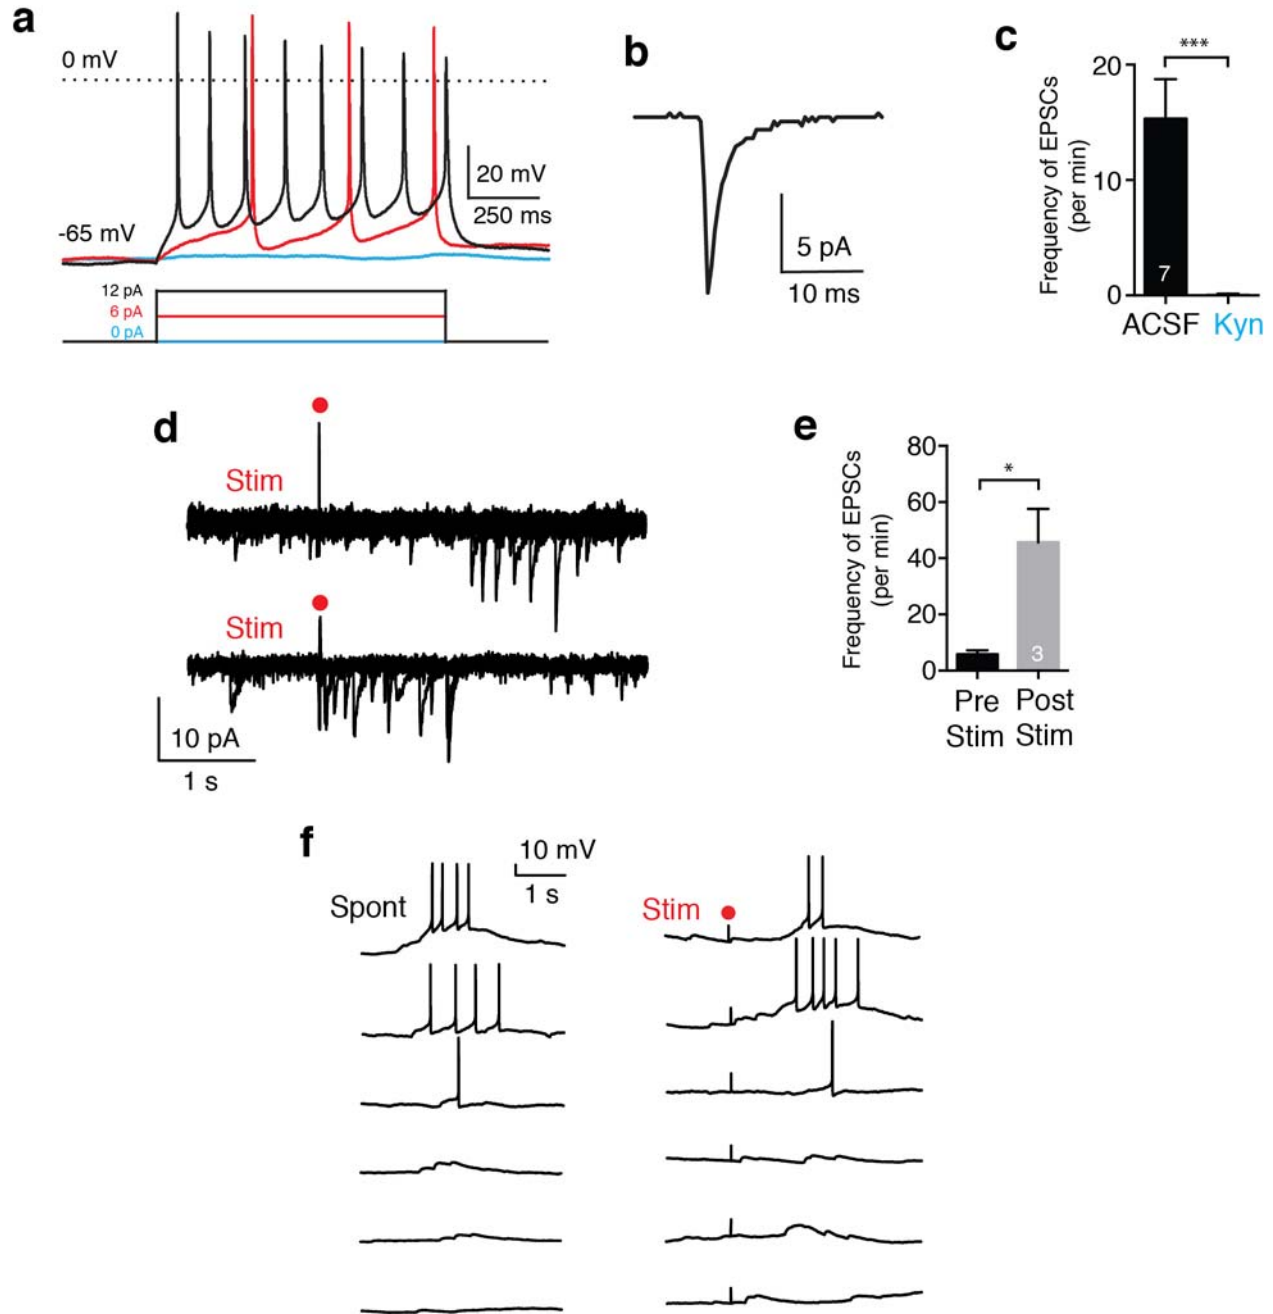

### Supplementary Figure 8

Electrophysiology (hCS slice recordings).

(a) Representative trace of a whole-cell current-clamp recording in an acute hCS slice preparation. Current injections (6 or 12 pA steps from  $-65$  mV) produce sustained action potential generation. (b) Representative averaged trace of 53 sEPSCs in an individual hCS neuron under control conditions. (c) EPSCs were blocked by bath application of kynurenic acid in sliced hCSs (t-test,  $n = 6$  cells;  $P = 0.0008$ ). (d) Examples of voltage clamp recordings in two different hCSs showing EPSCs after electrical stimulation in an acute hCS slice preparation. The electrical stimulation artifact is designated by a red dot. (e) EPSC frequency 1s prior compared to 2s after electrical stimulation (t-test,  $n = 3$  cells;  $P = 0.02$ ) (f) Left: Representative traces of spontaneous action potentials (top three traces) and compound EPSPs (bottom three traces). Right: Representative examples of stimulus-evoked action potentials (top three traces) and compound EPSPs (bottom three traces). The electrical stimulation artifact is designated by a red dot.

| ID           | geneSymbol | Pval_3D Differentiation | LogFC_3D differentiation | PVal_Monolayer | LogFC_Monolayer | PVal_Fetal brain stage 1vs6 | LogFC_Fetal Brain stage 1vs6 |
|--------------|------------|-------------------------|--------------------------|----------------|-----------------|-----------------------------|------------------------------|
| ILMN_1757081 | SYN2       | 0.003424706             | 1.881921746              | 0.0304413      | 0.210026365     | 0.001335288                 | 2.620524794                  |
| ILMN_1697189 | PNCK       | 0.000143979             | 1.815778106              | 0.555391046    | 0.182521156     | 3.02E-07                    | 1.625465688                  |
| ILMN_1670028 | LPIN2      | 0.004990967             | 1.119344082              | 0.006821088    | -0.229568008    | 1.91E-06                    | 1.113754791                  |
| ILMN_1793241 | SRD5A1     | 0.002626577             | 1.086058965              | 0.409975222    | -0.062709191    | 1.88E-06                    | 1.517676958                  |
| ILMN_1737089 | CAPN5      | 0.001248015             | 1.05778912               | 0.031150992    | -0.284724084    | 0.000482143                 | 1.304110264                  |
| ILMN_1807925 | GNG2       | 0.004873057             | 1.050276872              | 0.102894382    | 0.294578531     | 0.001175852                 | 1.371872185                  |
| ILMN_1785191 | TMEM14A    | 0.003724355             | 0.991126255              | 0.233787557    | 0.156082104     | 0.000995251                 | 1.455169924                  |
| ILMN_2382505 | SLC22A18   | 0.004825291             | 0.877010208              | 0.398491901    | 0.106208354     | 0.000817936                 | 0.460535107                  |
| ILMN_1796377 | C14orf37   | 0.000509971             | 0.683039584              | 0.033394192    | -0.22834774     | 0.000296737                 | 0.855433125                  |
| ILMN_1784749 | GAS6       | 0.004835575             | 0.651637059              | 0.022776043    | 0.471901789     | 0.003565578                 | 0.565754696                  |
| ILMN_1760922 | GIT2       | 0.000315509             | 0.617981876              | 0.047505514    | -0.140457366    | 0.000969808                 | 0.575931197                  |
| ILMN_1790508 | KCNA5      | 0.003460485             | 0.563013651              | 0.379275592    | 0.09213923      | 0.001931649                 | 0.531163348                  |
| ILMN_1765001 | NAT6       | 0.001044298             | 0.555362121              | 0.641629398    | -0.053333022    | 3.70E-06                    | 0.711310414                  |
| ILMN_1718771 | CCDC24     | 0.003710791             | 0.525383583              | 0.170979899    | -0.195470229    | 2.65E-05                    | 0.631296431                  |
| ILMN_1739154 | LSAMP      | 0.000123167             | 0.468119467              | 0.015264725    | -0.275352916    | 3.27E-05                    | 1.322345311                  |
| ILMN_2068747 | OAT        | 0.004578799             | 0.357445904              | 0.929403499    | 0.011031975     | 0.000116989                 | -1.785603441                 |
| ILMN_2400292 | MAPK9      | 0.002369625             | 0.28095182               | 0.191370897    | -0.138637347    | 7.79E-06                    | 1.193286368                  |
| ILMN_1765257 | CINP       | 0.00225714              | 0.237875265              | 0.932087722    | 0.00615476      | 0.002833284                 | 0.798138954                  |
| ILMN_1807181 | BACH1      | 0.00200797              | -0.129290077             | 0.640773062    | 0.022118782     | 0.002212872                 | -1.132606613                 |
| ILMN_1742324 | C1orf9     | 0.003879886             | -0.135825586             | 0.13227243     | 0.114800925     | 0.000514025                 | -0.723654442                 |
| ILMN_1765159 | ELMOD2     | 0.004146402             | -0.201928175             | 0.007400399    | -0.349594829    | 6.79E-07                    | -1.62699728                  |
| ILMN_1788108 | TXNDC5     | 0.00109754              | -0.276815944             | 0.049946634    | -0.204415835    | 0.000397204                 | -1.469944971                 |
| ILMN_1708991 | CCNY       | 0.000351113             | -0.299031527             | 0.227821509    | 0.123722519     | 0.002648834                 | -1.066553841                 |
| ILMN_1799151 | PP1L4      | 0.002490308             | -0.312236325             | 0.025125958    | 0.163142738     | 0.001804393                 | -0.426464972                 |
| ILMN_1732566 | TMTC3      | 0.00230638              | -0.324629165             | 0.509554801    | -0.055333185    | 2.82E-05                    | -1.691651241                 |
| ILMN_1756426 | HDLBP      | 0.002642431             | -0.327575314             | 0.952481193    | 0.005378636     | 0.00015071                  | -0.918755733                 |
| ILMN_1800412 | BMP1       | 0.003354788             | -0.346502634             | 0.238535484    | -0.24056278     | 0.000268553                 | -0.845675052                 |
| ILMN_1810838 | MTDH       | 0.004340294             | -0.38089403              | 0.031137704    | 0.107290345     | 0.002357856                 | -0.996125379                 |
| ILMN_2397230 | USP16      | 0.002052714             | -0.406833872             | 0.94106668     | 0.007647768     | 0.004993946                 | -0.55025428                  |
| ILMN_2121437 | NCL        | 0.000869961             | -0.425418628             | 0.464460059    | -0.033866017    | 0.000352175                 | -0.851792463                 |
| ILMN_1802089 | SYMPK      | 0.002521406             | -0.452772726             | 0.053825502    | -0.214526906    | 0.004230595                 | -0.532086967                 |
| ILMN_2272074 | TROVE2     | 0.002640189             | -0.482892591             | 0.680443891    | -0.032372809    | 0.000944189                 | -0.970625226                 |
| ILMN_1756767 | EIF5B      | 0.00208903              | -0.495771964             | 0.242185851    | -0.065101096    | 0.00025386                  | -0.827028816                 |
| ILMN_1655645 | AK2        | 0.002948532             | -0.512423517             | 0.034920947    | -0.237593256    | 0.001873008                 | -1.18084599                  |
| ILMN_2187746 | EMX2       | 0.00173927              | -0.534775208             | 0.033708115    | -0.644027316    | 1.25E-06                    | -2.60421998                  |
| ILMN_1702447 | IGF2BP2    | 0.000108119             | -0.546974679             | 0.013721424    | -0.191567982    | 0.000270715                 | -1.558051782                 |
| ILMN_2397261 | DDB1       | 0.003972661             | -0.547349757             | 0.248217984    | -0.096223451    | 0.001219706                 | -0.788770152                 |
| ILMN_2371470 | C1orf124   | 0.000393493             | -0.551812456             | 0.373315322    | 0.100462246     | 7.06E-05                    | -1.272116461                 |
| ILMN_1710524 | PARD3      | 0.000569884             | -0.555511283             | 0.362972562    | -0.062788506    | 3.78E-08                    | -3.04530645                  |
| ILMN_1753370 | ABTB2      | 0.000736674             | -0.55801137              | 0.342672724    | -0.156416433    | 0.000504521                 | -1.480342968                 |
| ILMN_1690610 | RALY       | 0.000661482             | -0.605694333             | 0.323511904    | -0.086687316    | 0.001574002                 | -0.723216115                 |
| ILMN_1763264 | MRPL2      | 0.002184551             | -0.615348966             | 0.510097281    | -0.073024547    | 0.004386454                 | -1.074103921                 |
| ILMN_1765082 | RBM10      | 0.001371822             | -0.61834817              | 0.884345068    | -0.014521573    | 6.08E-05                    | -0.434892365                 |
| ILMN_1811636 | IFT57      | 0.000721043             | -0.639675966             | 0.684680696    | 0.051596462     | 0.003519234                 | -1.184788022                 |
| ILMN_1694978 | WDR18      | 0.004694785             | -0.649728595             | 0.076095352    | -0.148458447    | 0.003318257                 | -0.845087287                 |
| ILMN_2182750 | DDX1       | 0.002594261             | -0.711498523             | 0.679669508    | -0.03218584     | 0.001082238                 | -0.612468137                 |
| ILMN_1741477 | SMAD4      | 0.00354598              | -0.722083851             | 0.030760355    | -0.216060088    | 0.001460366                 | -0.885455559                 |
| ILMN_1700604 | RBM14      | 0.000916231             | -0.728701732             | 0.169252301    | -0.133363959    | 0.000289112                 | -0.724349668                 |
| ILMN_1801905 | ATG4D      | 0.002947623             | -0.760589595             | 0.242684773    | 0.086204435     | 0.000170197                 | -0.919884563                 |
| ILMN_1685928 | WDR34      | 0.001802035             | -0.767953426             | 0.069235151    | -0.294620881    | 0.000672887                 | -1.402384069                 |
| ILMN_1738347 | RNPEP      | 0.002407532             | -0.793426526             | 0.033452031    | -0.371374848    | 0.001243771                 | -0.762200415                 |
| ILMN_1753164 | IPO8       | 0.004119667             | -0.802039697             | 0.007196824    | -0.260392915    | 4.69E-05                    | -1.007647634                 |
| ILMN_2357577 | PRKAA1     | 0.002187919             | -0.806148905             | 0.175585736    | 0.060067811     | 7.18E-07                    | -0.738753132                 |
| ILMN_2145518 | TMEM126B   | 0.004746557             | -0.809039951             | 0.044478778    | -0.12917793     | 0.000706488                 | -0.821445859                 |
| ILMN_2415529 | CDK5RAP2   | 0.004887835             | -0.828807642             | 0.074097164    | -0.188927136    | 0.000351681                 | -1.34988014                  |
| ILMN_1717094 | ZNF618     | 3.98E-05                | -0.83993616              | 0.030173245    | 0.180769107     | 5.48E-05                    | -2.55454591                  |
| ILMN_2310253 | TARBP2     | 0.004455577             | -0.846331994             | 0.076094921    | -0.169617357    | 0.003056874                 | -0.860719624                 |
| ILMN_1784523 | ATP6V1G1   | 0.000523621             | -0.865234719             | 0.233130618    | -0.073309931    | 0.00015614                  | -1.145152437                 |
| ILMN_1703683 | COG4       | 0.002397784             | -0.968510673             | 0.036731624    | -0.190101132    | 0.001430134                 | -0.740012721                 |
| ILMN_1705570 | H2AFY2     | 0.003313497             | -0.992757663             | 0.020943315    | -0.183253524    | 0.000301664                 | -1.773236018                 |
| ILMN_1703524 | SRP68      | 4.95E-05                | -1.007259746             | 0.279322914    | -0.064827119    | 0.000103175                 | -1.039852328                 |
| ILMN_1670899 | FBN2       | 0.004060499             | -1.051706113             | 0.005102894    | -0.547641308    | 0.000564429                 | -3.039533308                 |
| ILMN_1689123 | CCNK       | 0.000797288             | -1.057310813             | 0.725039475    | 0.018290134     | 0.002938479                 | -1.330262973                 |
| ILMN_1758674 | TMEM93     | 0.001952414             | -1.076383023             | 0.344811525    | -0.086556598    | 0.003719292                 | -0.709370876                 |
| ILMN_1662331 | PDSS2      | 0.001049851             | -1.12465788              | 0.433461666    | -0.073791725    | 0.001978235                 | -0.260805731                 |
| ILMN_2403889 | PRMT5      | 0.00417783              | -1.171855103             | 0.123915479    | -0.114107397    | 0.000660678                 | -1.051880568                 |
| ILMN_1773716 | MRPL9      | 0.004915387             | -1.191691509             | 0.123009924    | -0.119770965    | 0.001294591                 | -0.82590083                  |
| ILMN_1792435 | STAG1      | 0.000527408             | -1.253028008             | 0.015895085    | -0.227897439    | 0.0003661                   | -0.753663802                 |
| ILMN_1761479 | ZC3HC1     | 0.00114319              | -1.271257963             | 0.008271959    | -0.321528413    | 0.002066879                 | -0.549346769                 |
| ILMN_1784037 | ZBTB40     | 0.002551461             | -1.319725789             | 0.365872221    | -0.127802582    | 0.000982822                 | -0.608520799                 |
| ILMN_1734317 | DPF2       | 0.000913596             | -1.370036149             | 0.027885122    | -0.219960548    | 8.48E-06                    | -1.502233588                 |
